# Supplementary material for: Benefits of Net Zero policies for future ozone pollution in China
Source: Copernicus journal article supplement (doi:10.5194/egusphere-2023-230), 2023-05-22
Supplement: Supplementary file 1 [file egusphere-2023-230-supplement.pdf]

## Benefits of Net Zero policies for future ozone pollution in China

Zhenze Liu et al.

Correspond to: Zhenze Liu (zhenze.liu@nuist.edu.cn)

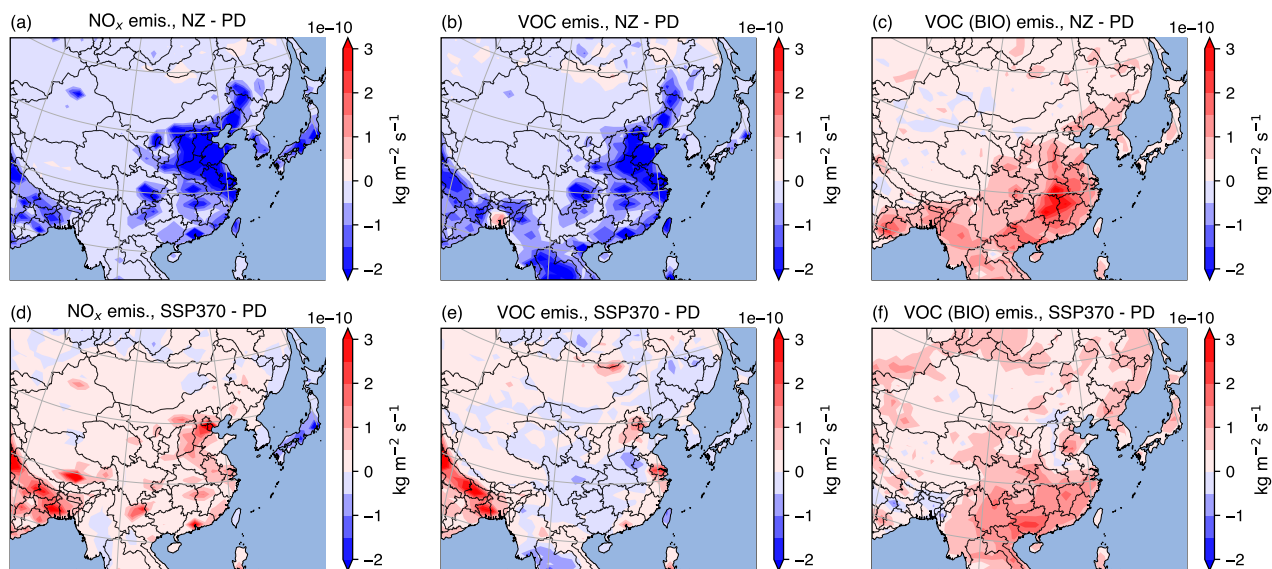

**Figure S1.** Differences in annual mean surface emissions in anthropogenic and biomass burning NO<sub>x</sub>, VOCs, and biogenic VOCs (BIO) between the present day (PD) and the scenarios of Net Zero (NZ; **a, b, c**) and SSP3-7.0 (**d, e, f**).

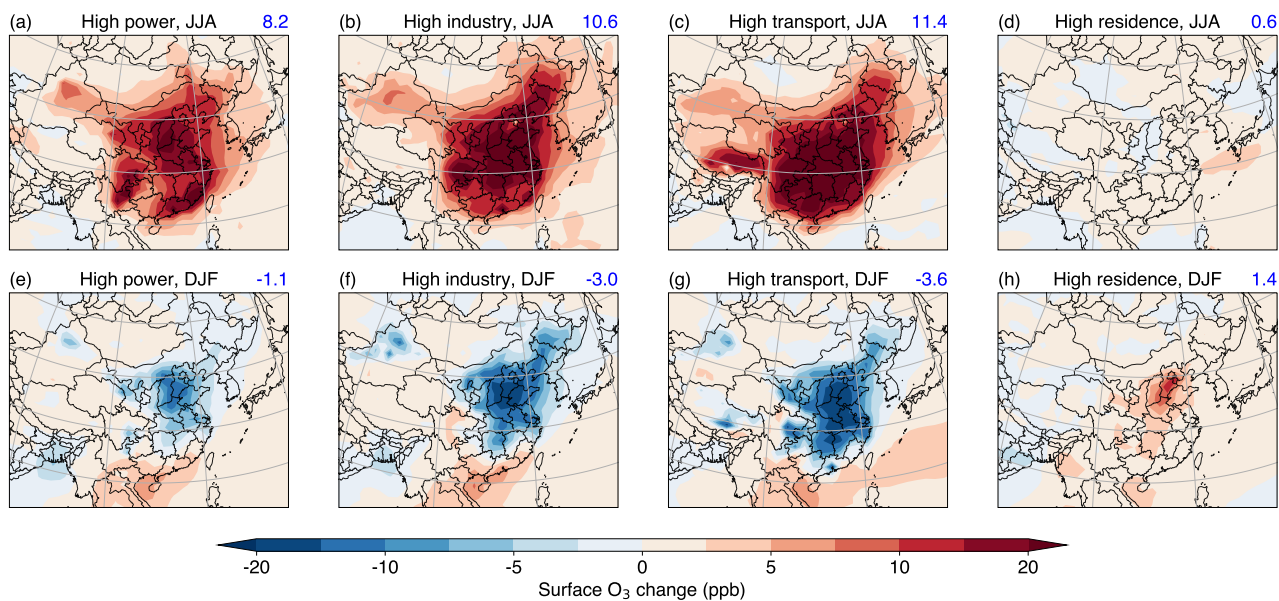

**Figure S2.** Changes in seasonal (JJA and DJF) surface  $O_3$  mixing ratios between the scenario of Net Zero and SSP3-7.0 (SSP3-7.0 – Net Zero). Influences of higher emissions in different individual sectors, (a, e) power, (b, f) industry, (c, g) transport and (d, h) residence on surface  $O_3$  changes are shown separately. Mean  $O_3$  changes over China are given in the top right corner.

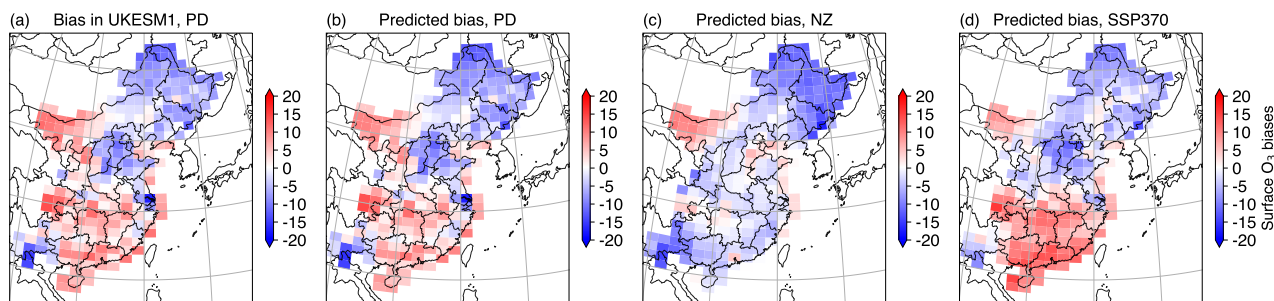

**Figure S3.** Annual mean biases in surface  $O_3$  simulations (ppb) from (a) UKESM1, and the predicted biases in (b) the present day (PD), (c) the Net Zero (NZ), and (d) the SSP3-7.0 scenarios.

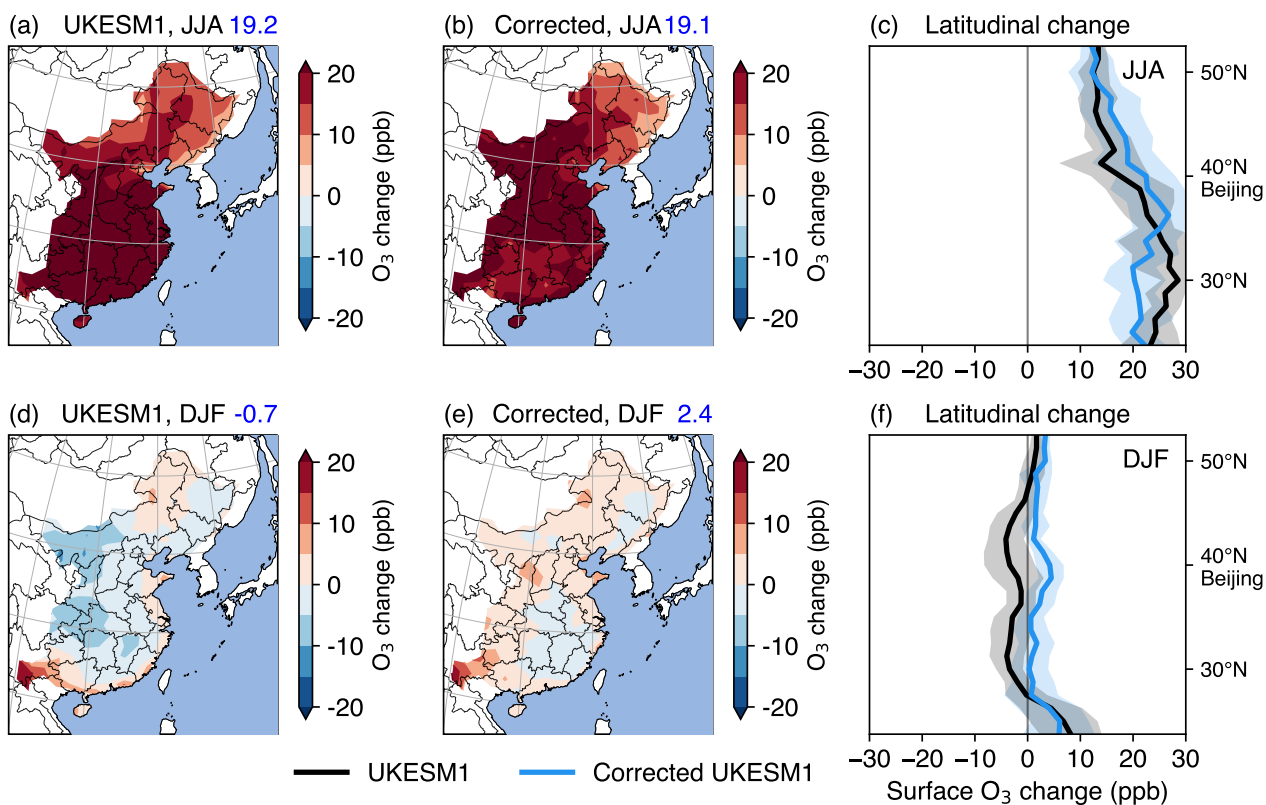

**Figure S4.** Seasonal mean changes in surface  $O_3$  mixing ratios from the present day to the future under SSP3-7.0 in China. Changes from UKESM1 and the corrected UKESM1 by the deep learning model in (a, b) summertime and (d, e) wintertime are shown. Mean latitudinal  $O_3$  change between UKESM1 and the corrected UKESM1 are shown in (c, f), with one standard deviation of  $O_3$  changes in latitude shown in shaded areas.
